# Supplementary material
Source: PubMed Central journal article supplement (PMC2710832)

*Supplementary Figure 1. SWI/SNF ATPase manipulation is used to interrogate function.*

(A) Schematic illustrating the use of Cre-recombinase to produce all combinations of Brm or Brg1 ATPase deficiency in both primary or 3T3 mouse adult fibroblasts. (B) Primary mouse adult fibroblasts were infected with either Ad-GFP or Ad-GFP-Cre. At 120 hours post infection, cells were harvested and PCR was performed. Lanes 1-2 denote size of indicated loci. Lanes 3-4 demonstrate recombination at the Brg1 locus.

*Supplementary Figure 2. Histone methylation remains unchanged despite the loss of SNF5.*

(A-C) Primary mouse embryonic fibroblasts derived from SNF5<sup>ff</sup> mice were transduced with either Ad-LacZ or Ad-Cre. At 120 hours post infection, cells were fixed in 1:1 Methanol-Acetone. Cells were immunostained for the indicated proteins and visualized by confocal microscopy.

*Supplementary Figure 3. Brg1-deficient 3T3 MAFs can continue to proliferate under selection.*

Brg1<sup>ff</sup> 3T3 MAFs were transfected with either a pBABE-puromycin selectable Cre-encoding plasmid, or a pBABE-puromycin selectable control plasmid. Cells were then passaged into media containing puromycin for 14 days. Next, 1x10<sup>3</sup> cells were plated onto glass coverslips in a 10-cm dish and allowed to grow for 48 hours—then harvested and stained for Brg1 and DAPI.

Figure S1

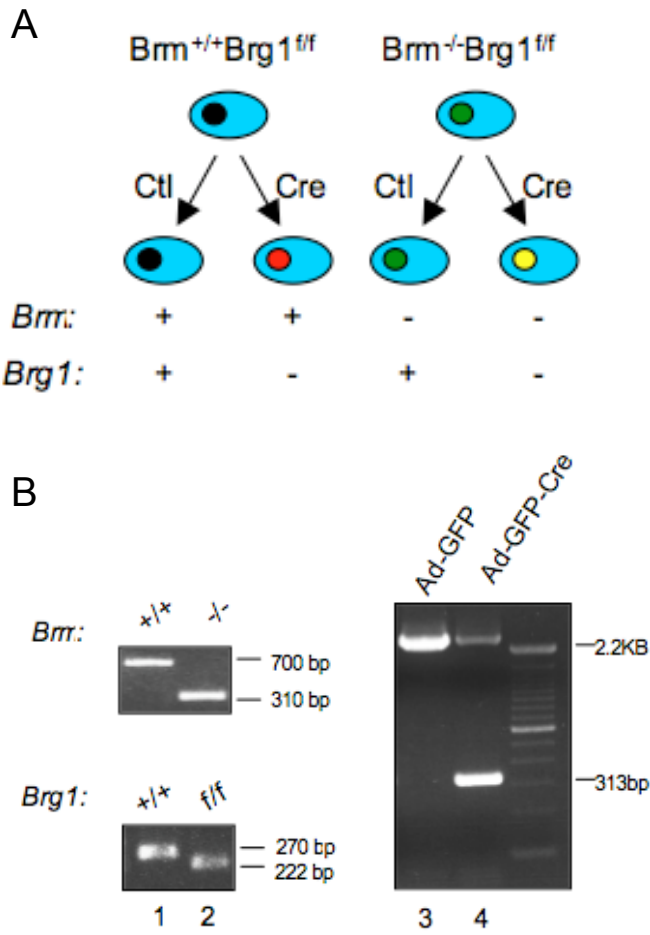

Figure S2

A

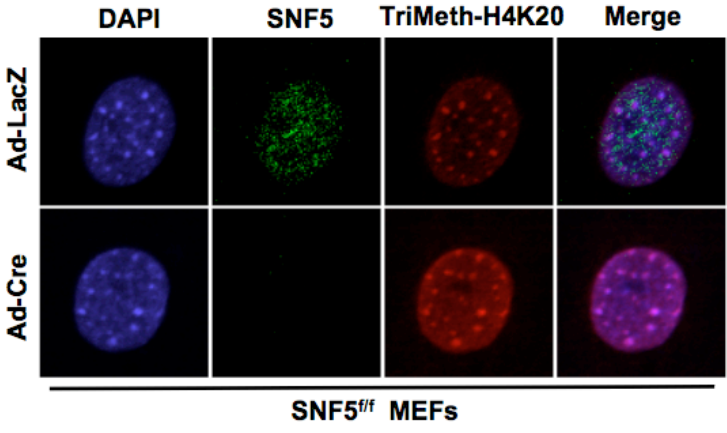

B

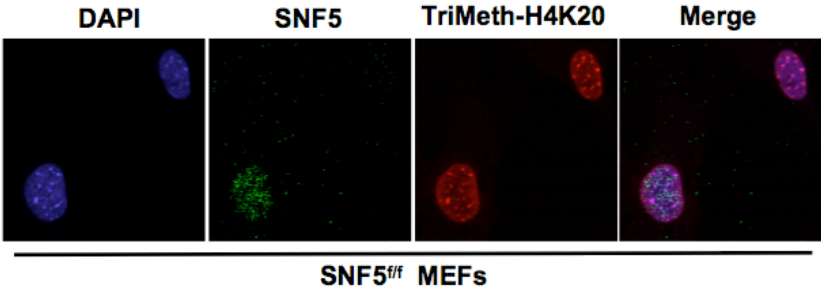

C

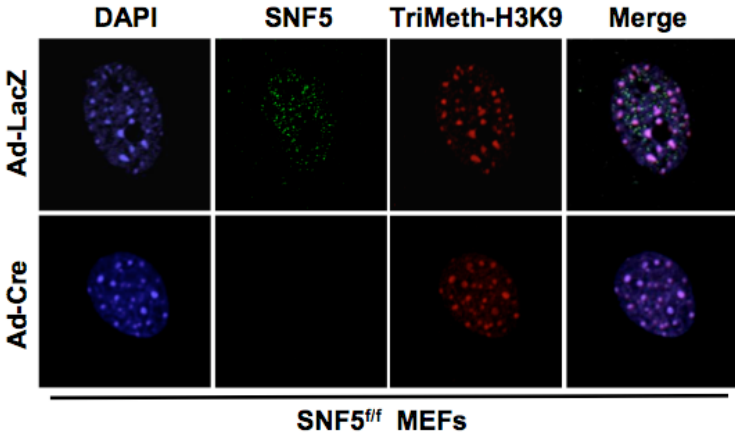

A

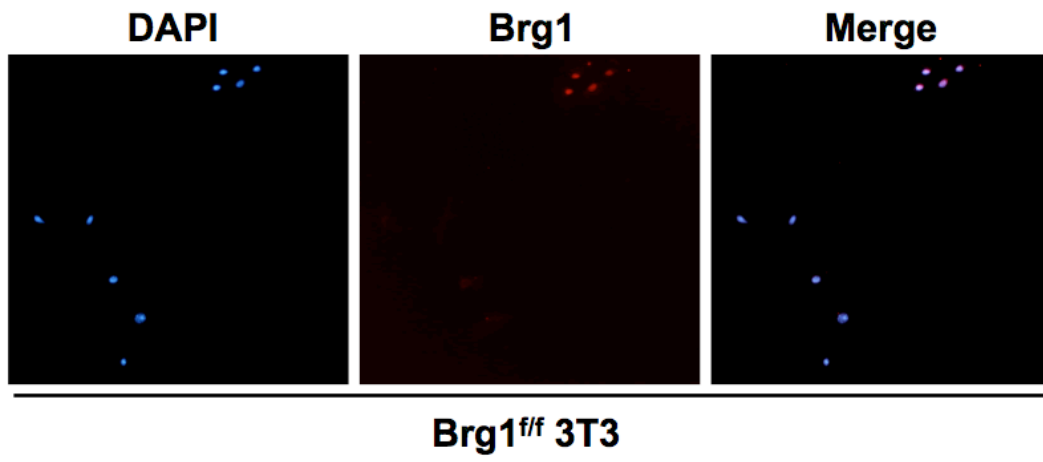

Supplement: E08-12-1224_1.pdf [file E08-12-1224_1.pdf]
